# Supplementary material for: Targeting chemoresistant senescent pancreatic cancer cells improves conventional treatment efficacy
Source: Springer Nature journal article supplement (doi:10.1186/s43556-023-00116-4), 2023-02-05
Supplement: MOESM1 [file 43556_2023_116_MOESM1_ESM.pdf]

# Targeting chemoresistant senescent pancreatic cancer cells improves conventional treatment efficacy

Suppl. Fig. 1

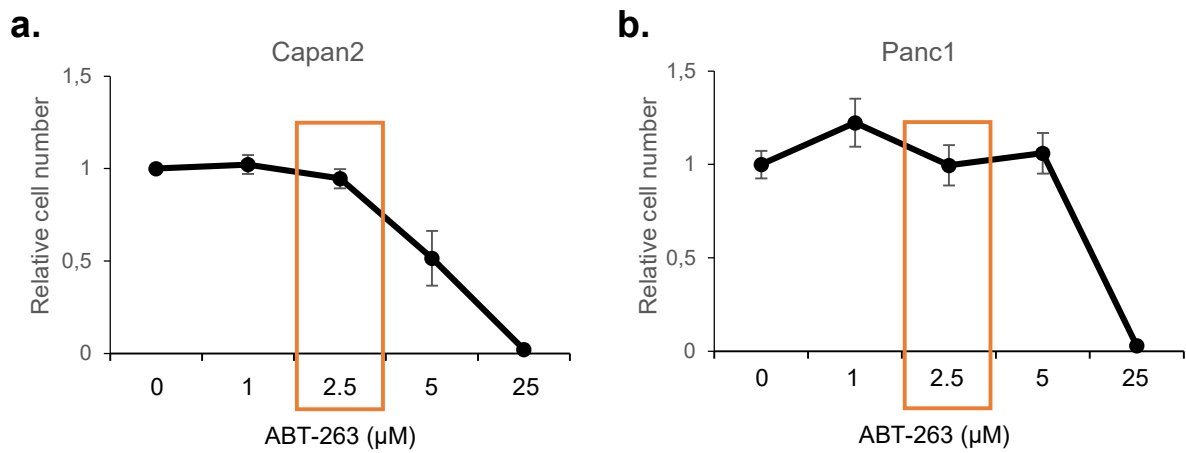

**Fig. 1** Determination of optimal ABT-263 concentration. Representation of relative cell number in response to increasing concentrations of ABT-263 in Capan2 (a) and Panc1 (b) cells.

Suppl. Fig. 2

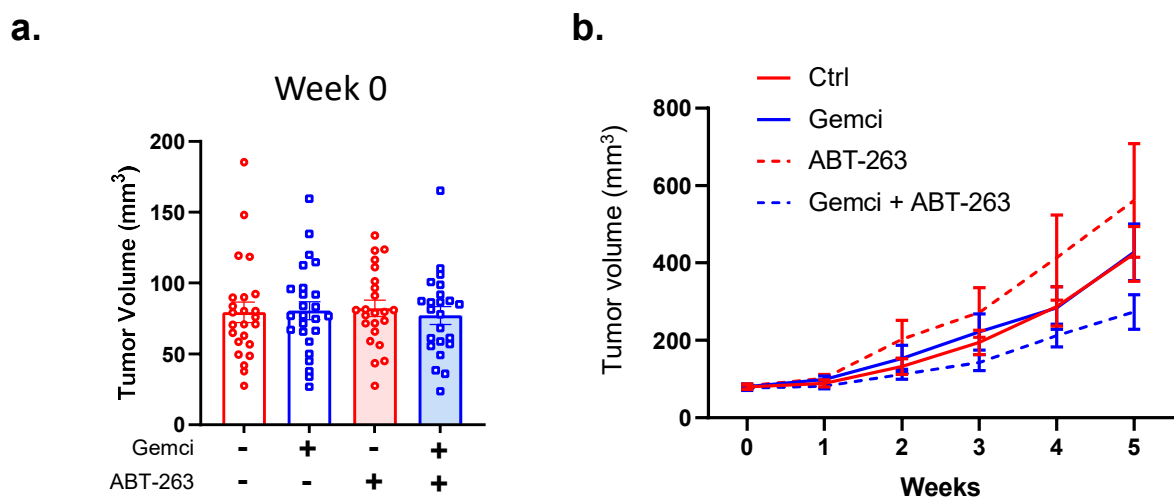

**Fig. 2** ABT-263 and gemcitabine slowdown tumor growth. **a**, Mice were randomized in 4 groups with an average tumor size of 80  $\text{mm}^3$ . Tumor volume for each mouse is indicated at the beginning of the treatment (week 0) (mean  $\pm$  SEM, Kruskal-Wallis Test, no significant differences were observed between the groups). **b**, Tumor volumes during 5 weeks of treatment are shown (mean  $\pm$  SEM, Kruskal-Wallis Test, no significant differences were observed between the groups).
